# Supplementary material
Source: PubMed Central journal article supplement (PMC3581861)
Supplement: NIHMS435952-supplement-Supp_Fig_S4.pdf [file NIHMS435952-supplement-Supp_Fig_S4.pdf]

# Hierarchical clustering of module eigengenes

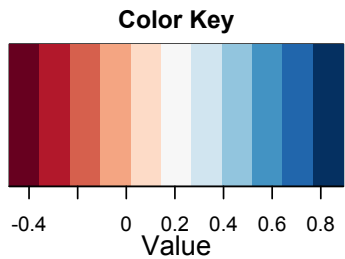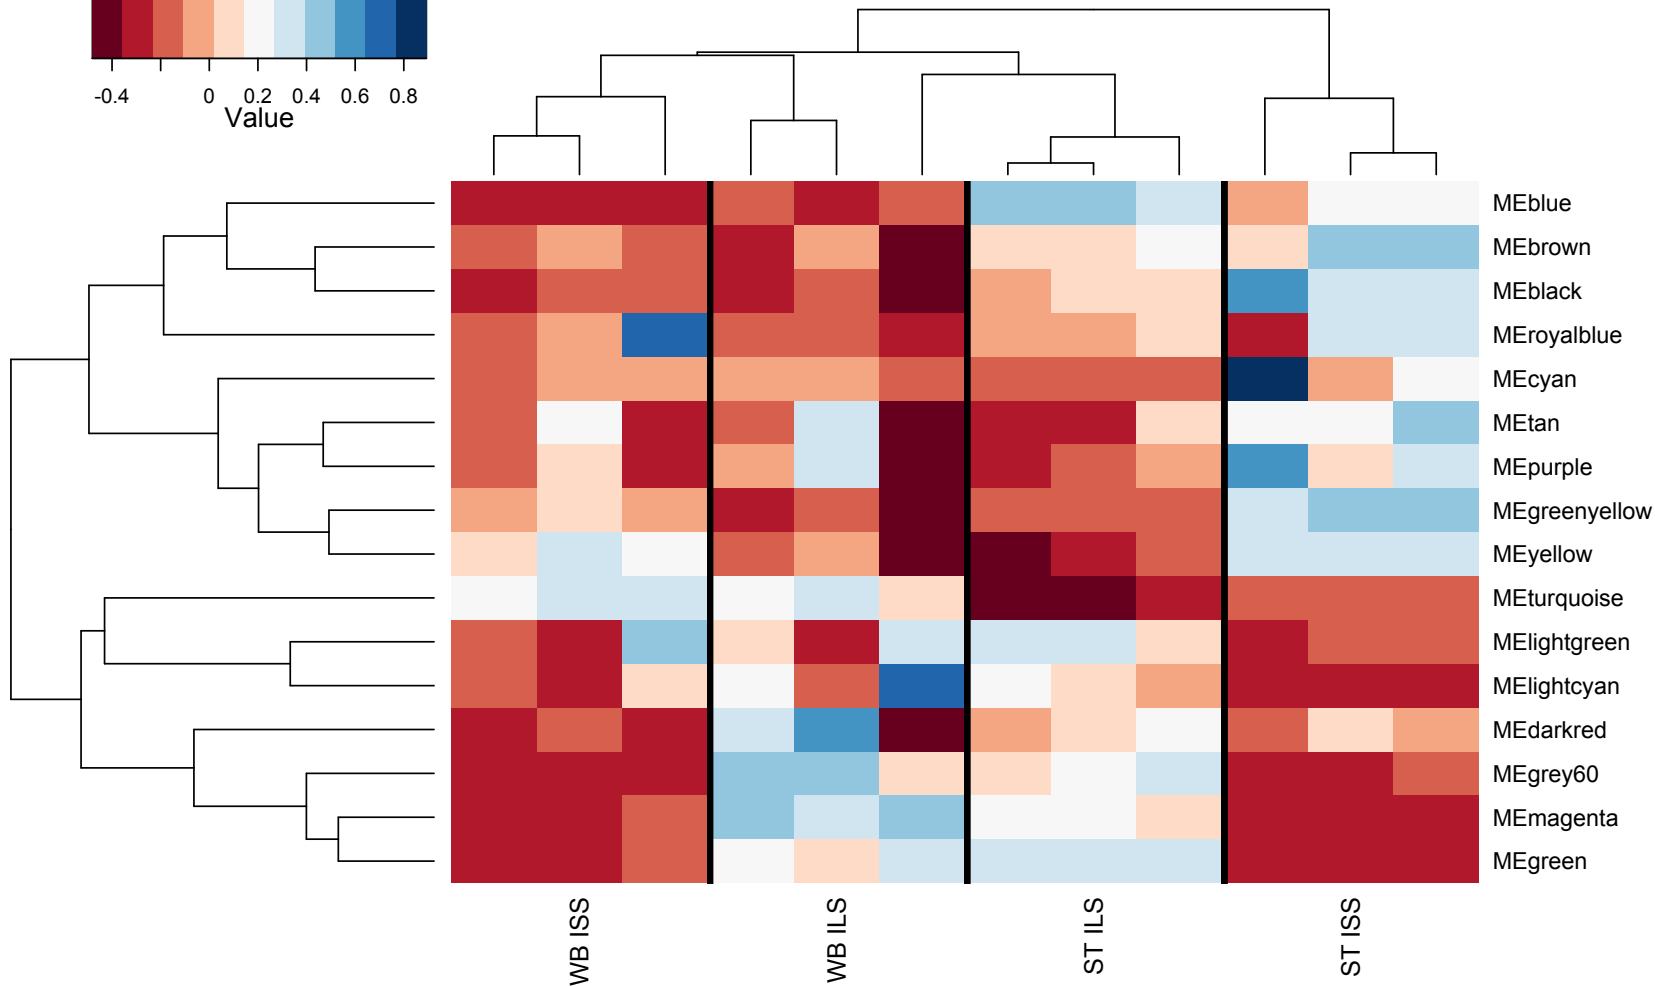

Hierarchical cluster of each module eigengene (rows) and each sample (columns). Eigengene values range from approximately -0.5 to 0.9, representing sample specific expression levels. Higher expression is denoted with blue colors, lower expression by red colors.
